# Supplementary figures and images for: Inflammatory markers in saliva and urine reflect disease activity in patients with systemic lupus erythematosus
Source: PubMed Central journal article supplement — Lupus Sci Med. 2022 Mar 4;9(1):e000607. doi: 10.1136/lupus-2021-000607 (PMC8900065; doi:10.1136/lupus-2021-000607), 2022-03-04

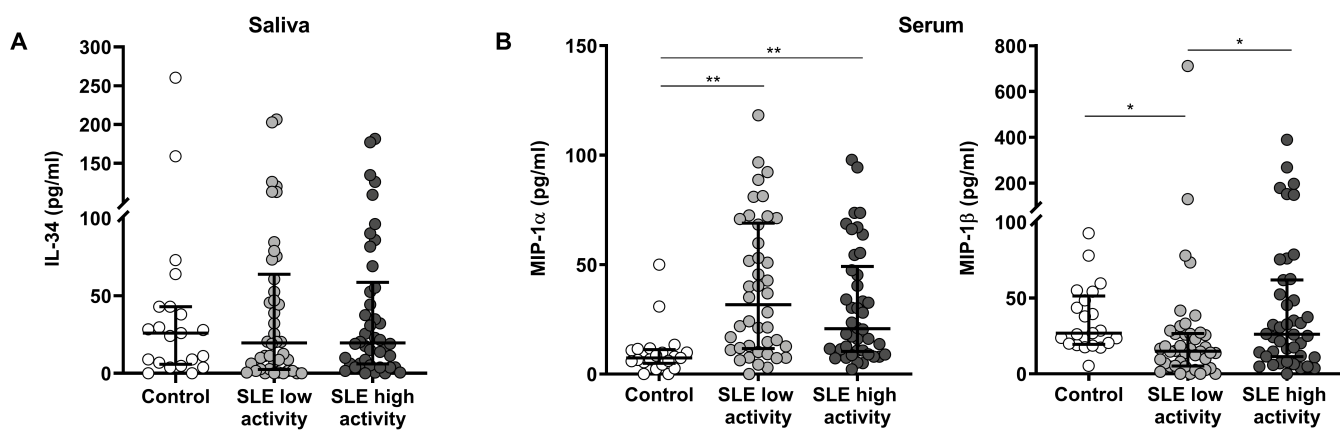

Supplement: lupus-2021-000607supp001.pdf [file lupus-2021-000607supp001.pdf]
