# Supplementary figures and images for: Inflammatory markers in saliva and urine reflect disease activity in patients with systemic lupus erythematosus
Source: HighWire-hosted journal article supplement (doi:10.1136/lupus-2021-000607), 2022-03-01

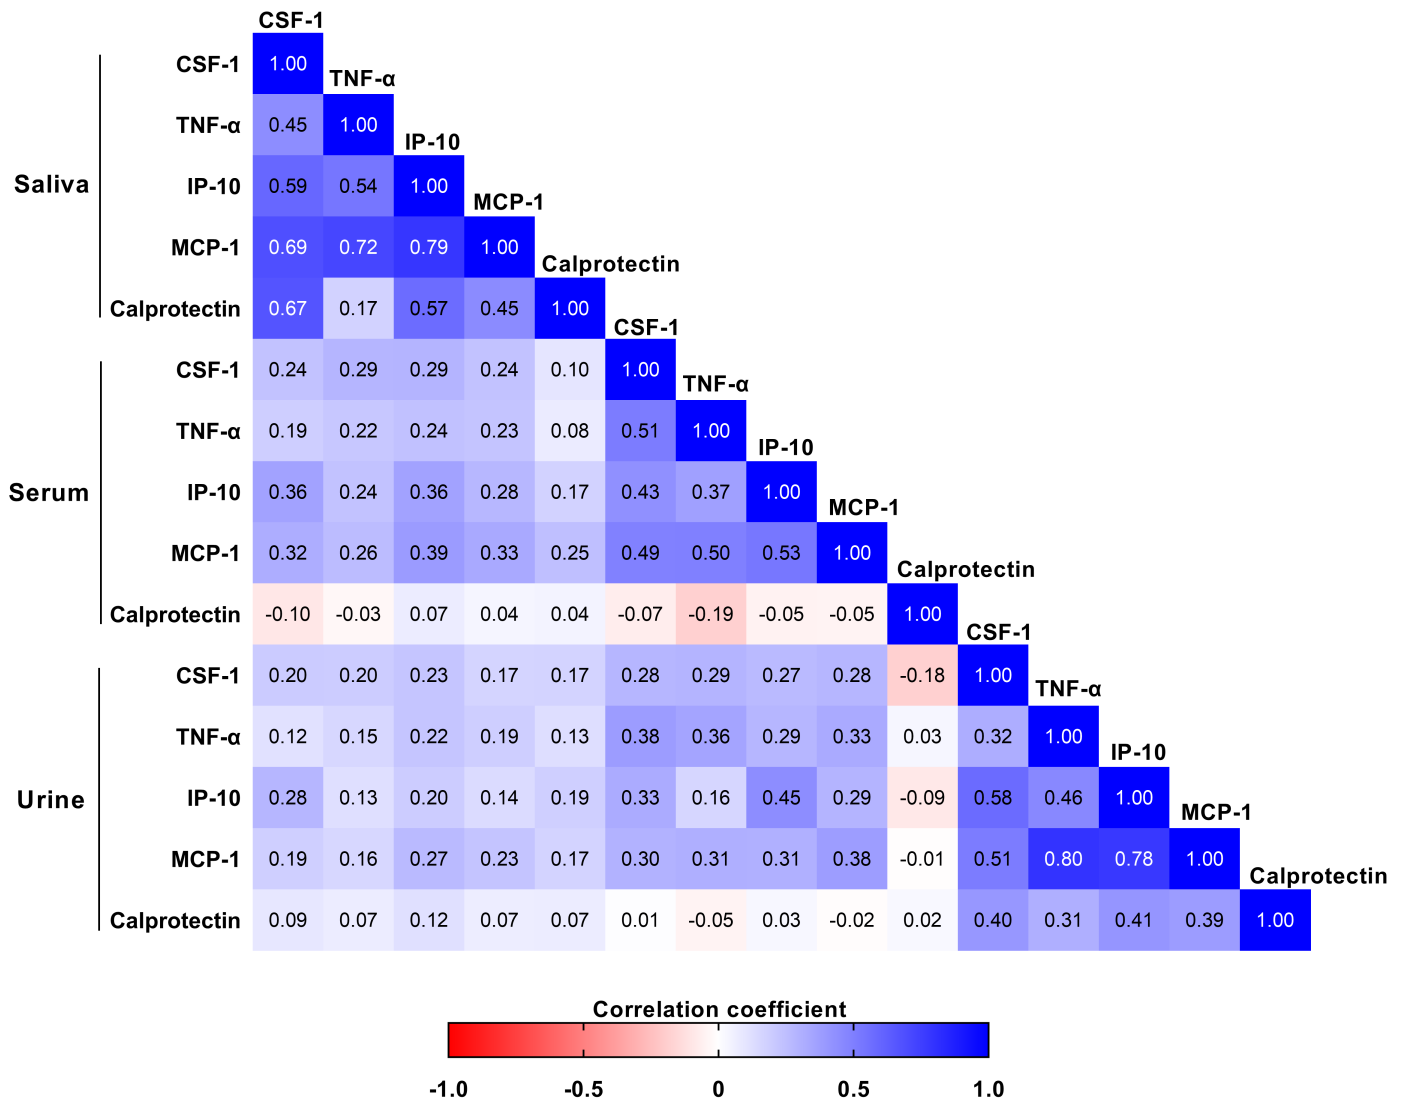

Supplement: lupus-2021-000607supp002_data_supplement.pdf [file lupus-2021-000607supp002_data_supplement.pdf]
